# Supplementary material for: The role of flexibility and optimality in the prediction of intracellular fluxes of microbial central carbon metabolism
Source: Royal Society of Chemistry journal article supplement (doi:10.1039/c4mb00117f), 2014-06-25
Supplement: c4mb00117f1.xlsx [file c4mb00117f1.xlsx]

## Sheet: Ecoli
	Anaerobic Batch- E.coli			min. of Euclid. Norm		min. of abs. sum of fluxes		Geometric FBA				min. of Euclid. Norm		min. of abs. sum of fluxes		Geometric FBA
											mmol/g/h
		EXP	Std Dev.	Strict Opt	Flex Opt	Strict Opt	Flex Opt	Strict Opt	Flex Opt		EXCHANGE	Strict Opt	Flex Opt	Strict Opt	Flex Opt	Strict Opt	Flex Opt
Split between glycolysis and PPP	R1	0.9	0.05	1	0.905446	1	0.888747	1	0.905976		Oxygen	0	0	0	0	0	0
Flux into Entner-Doudoroff pathway	R2	0.86	0.94	0.978412	0.488493	0	0.0596576	0	0		Ethanol	15.0848	19.7854	15.0848	17.5537	15.0848	19.7733
Flux into methylgloxal pathway	R3	0	0.05	1.24103e-12	1.10452e-11	0	0	0	0		Acetate	15.1558	9.93781	15.1558	10.0395	15.1558	9.23697
PEP to pyruvate flux	R4	0.94	0.05	0.948637	0.949158	0.948637	0.949683	0.948637	0.94972		Succinate	0.146975	0.141017	0.146975	0.141134	0.146975	0.141768
Pyruvate to Acetyl-CoA flux	R5	0.96	0.09	0.960589	0.947255	0.960589	0.8927	0.960589	0.934512		Lactate	3.5474e-11	0.491577	0	2.27085	0	0.889882
Flux into TCA cycle	R6	0.02	0.01	0.0146773	0.0143489	0.0146773	0.0153956	0.0146773	0.0147526		Pyruvate	-1.21297e-11	-1.21944e-11	0	0	0	0
Flux into glyoxylate shunt	R7	0	0.05	9.04081e-12	5.00531e-11	0	0	0	0		Formate	31.8954	23.1848	31.8954	25.4708	31.8954	23.4806
Oxaloacetate to PEP flux	R8	0	0.05	2.83888e-12	1.47642e-11	0	0	0	0		Biomass	0.440391	0.422538	0.440391	0.42289	0.440391	0.424791
Acetate secretion	R9	0.34	0.01	0.4618	0.306085	0.4618	0.331577	0.4618	0.290353		Glucose	-18.5	-18.5	-18.5	-18.5	-18.5	-18.5
Ethanol secretion	R10	0.61	0.04	0.46753	0.624826	0.46753	0.594294	0.46753	0.638614
				0.0072765	0.000535805	0.00731263	0.000103038	0.00731263	0.00116119
	Aerobic Batch- E.coli			min. of Euclid. Norm		min. of abs. sum of fluxes		Geometric FBA				min. of Euclid. Norm		min. of abs. sum of fluxes		Geometric FBA
											mmol/g/h
		EXP	Std Dev.	Strict Opt	Flex Opt	Strict Opt	Flex Opt	Strict Opt	Flex Opt		EXCHANGE	Strict Opt	Flex Opt	Strict Opt	Flex Opt	Strict Opt	Flex Opt
Split between glycolysis and PPP	R1	0.7	0.02	0.472121	0.476064	0.472121	0.43325	0.472121	0.483517		Oxygen	-11.9319	-11.5995	-11.9319	-11.2264	-11.9319	-11.9296
Flux into Entner-Doudoroff pathway	R2	0.13	0.06	3.78898e-10	0.0146476	0	0.120397	0	0		Ethanol	0	0	0	0	0	0
Flux into methylgloxal pathway	R3	0	0.05	3.54293e-12	1.05772e-11	0	0	0	0		Acetate	3.85907	4.54495	3.85907	4.71779	3.85907	2.92485
PEP to pyruvate flux	R4	0.78	0.02	0.797636	0.80676	0.797636	0.799473	0.797636	0.790442		Succinate	0	0	0	0	0	0
Pyruvate to Acetyl-CoA flux	R5	0.81	0.03	0.801216	0.813349	0.801216	0.814257	0.801216	0.792407		Lactate	0	0	0	0	0	0
Flux into TCA cycle	R6	0.24	0.02	0.205754	0.157857	0.205754	0.139973	0.205754	0.274629		Pyruvate	0	0	0	0	0	0
Flux into glyoxylate shunt	R7	0	0.05	2.19014e-11	8.38746e-11	0	0	0	0		Formate	0	0	0	0	0	0
Oxaloacetate to PEP flux	R8	0	0.05	2.97302e-12	1.23659e-11	0	0	0	0		Biomass	0.616068	0.591847	0.616068	0.590866	0.616068	0.590691
Acetate secretion	R9	0.58	0.03	0.461244	0.533673	0.461244	0.553361	0.461244	0.37414		Glucose	-7.698	-7.698	-7.698	-7.698	-7.698	-7.698
Ethanol secretion	R10	0	0.05	5.81391e-12	5.54143e-11	0	0	0	0
				0.0132743	0.0129415	0.0132743	0.0176452	0.0132743	0.0143841
	Aerobic Chemostat- E.coli			min. of Euclid. Norm		min. of abs. sum of fluxes		Geometric FBA				min. of Euclid. Norm		min. of abs. sum of fluxes		Geometric FBA
											mmol/g/h
		EXP	Std Dev.	Strict Opt	Flex Opt	Strict Opt	Flex Opt	Strict Opt	Flex Opt		EXCHANGE	Strict Opt	Flex Opt	Strict Opt	Flex Opt	Strict Opt	Flex Opt
Split between glycolysis and PPP	R1	0.69	0.12	0.819914	0.844964	0.819914	0.817586	0.819914	0.817225		Oxygen	-3.44496	-3.61352	-3.44496	-3.45802	-3.44514	-3.46021
Flux into Entner-Doudoroff pathway	R2	0.23	0.2	1.09821e-11	7.16587e-10	0	0	0	0		Ethanol	0	0	0	0	0	0
Flux into methylgloxal pathway	R3	0	0.05	7.33704e-13	3.8121e-11	0	0	0	0		Acetate	0	0	-1.62553e-12	0	0	0
PEP to pyruvate flux	R4	0.84	0.14	0.819654	0.825262	0.819654	0.819202	0.819654	0.819132		Succinate	0	0	0	0	0	0
Pyruvate to Acetyl-CoA flux	R5	0.91	0.21	0.827281	0.835731	0.827281	0.826759	0.827281	0.826678		Lactate	0	0	0	0	0	0
Flux into TCA cycle	R6	0.64	0.13	0.729649	0.734523	0.729649	0.728716	0.729649	0.72857		Pyruvate	0	0	0	0	0	0
Flux into glyoxylate shunt	R7	0.46	0.13	6.13407e-12	1.11e-09	0	0	0	0		Formate	0	0	0	0	0	0
Oxaloacetate to PEP flux	R8	0.35	0.08	9.13429e-13	3.46376e-11	0	0	0	0		Biomass	0.1	0.1	0.1	0.1	0.1	0.1
Acetate secretion	R9	0	0.05	0	0	0	0	0	0		Glucose	-1.2921	-1.34247	-1.2921	-1.34214	-1.2921	-1.3499
Ethanol secretion	R10	0	0.05	1.68497e-11	4.29091e-10	0	0	0	0
				0.0211889	0.0215432	0.0211889	0.0211593	0.0211889	0.0211548

## Sheet: Scerevisiae
ANAEROBIC CHEMOSTAT - S.cerevisiae				min. of Euclid. Norm		min. of abs. sum of fluxes		Geometric FBA				min. of Euclid. Norm		min. of abs. sum of fluxes		Geometric FBA
											mmol/g/h
		EXP	Std Dev.	Strict Opt	Flex Opt	Strict Opt	Flex Opt	Strict Opt	Flex Opt		EXCHANGE	Strict Opt	Flex Opt	Strict Opt	Flex Opt	Strict Opt	Flex Opt
Split between glycolysis and PPP	R1	0.88	0.01	0.956823	0.929021	0.956823	0.935433	0.956881	0.654856		Growth	0.1	0.1	0.1	0.1	0.1	0.1
PEP to Pyruvate	R2	0.993865	0.01	0.994581	0.994598	0.994581	0.994605	0.994521	0.994005		Glucose	5.43799	5.65861	5.43799	5.65457	5.43799	5.66896
Flux into TCA cycle	R3	0.037037	0.01	0.00600301	0.00656638	0.00600301	0.00597651	0.00600301	0.00599419		Ethanol	-9.10606	-9.12451	-9.10606	-9.10606	-9.10606	-9.10606
Flux into Acetaldehyde from Pyruvate	R4	0.9167	0.01	0.958902	0.957134	0.958902	0.959084	0.958844	0.961517		Glycerol	-0.454588	-0.810233	-0.454587	-0.801291	-0.454587	-0.816107
Flux to PEP from oxaolacetatecyt	R5	0	0.01	4.09575e-11	1.38586e-10	0	0	0	0		Acetate	-8.83304e-11	-2.99534e-10	0	0	0	0
Flux into glyoxylate	R6	0	0.01	2.83336e-09	1.1696e-08	0	0	0	0		Succinate	-0.0197757	-0.0197757	-0.0197757	-0.0197757	-0.0197757	-0.0197757
Flux into ethanol from Acetaldehyde	R7	0.98991	0.01	0.978486	0.979254	0.978486	0.973982	0.978605	0.965278		Oxygen	0	0	0	0	0	0
Flux into Glycerol	R8	0.180851	0.01	0.0885065	0.152839	0.0885065	0.15092	0.0885065	0.153302
				0.0022	0.000733173	0.00216387	0.000873038	0.00216402	0.00694415
AEROBIC BATCH- S. cerevisiae				minimizn of Euclidean Norm				minimizn of absolute sum of fluxes				Geometric FBA						minimizn of Euclidean Norm				minimizn of absolute sum of fluxes				Geometric FBA
						GLX. Pathway is zero				GLX. Pathway is zero				GLX. Pathway is zero			mmol/g/h			GLX. Pathway is zero				GLX. Pathway is zero				GLX. Pathway is zero
		EXP	Std Dev.	Strict Opt	Flex Opt	Strict Opt	Flex Opt	Strict Opt	Flex Opt	Strict Opt	Flex Opt	Strict Opt	Flex Opt	Strict Opt	Flex Opt		EXCHANGE	Strict Opt	Flex Opt	Strict Opt	Flex Opt	Strict Opt	Flex Opt	Strict Opt	Flex Opt	Strict Opt	Flex Opt	Strict Opt	Flex Opt
Split between glycolysis and PPP	R1	0.85	0.0326599	0.874322	0.881485	0.873057	0.876437	0.874322	0.883266	0.873057	0.881143	0.874315	0.881267	0.87305	0.876393		Growth	0.428608	0.411246	0.425621	0.40841	0.428608	0.412219	0.425621	0.409729	0.428608	0.41196	0.425621	0.40875
PEP to Pyruvate	R2	0.991127	0.01	0.991743	0.991883	0.991804	0.991979	0.991743	0.991971	0.991804	0.992005	0.99172	0.991876	0.991781	0.991965		Glucose	15.3	15.3	15.3	15.3	15.3	15.3	15.3	15.3	15.3	15.3	15.3	15.3
Flux into TCA cycle	R3	0.0130307	0.0152966	0.0295084	0.0313154	0.0292227	0.0245919	0.0295084	0.0260948	0.0292227	0.024514	0.0295084	0.0312408	0.0292227	0.024571		Ethanol	-24.5153	-23.2118	-24.5522	-22.8065	-24.5153	-23.1277	-24.5522	-22.9093	-24.5153	-23.1928	-24.5522	-22.8324
Flux into Acetaldehyde from Pyruvate	R4	0.907149	0.0385333	0.911085	0.910078	0.911551	0.917436	0.911085	0.912846	0.911551	0.914868	0.911092	0.907479	0.911557	0.914643		Glycerol	-3.36783e-08	-0.796397	4.14525e-10	-0.652958	0	-0.442329	0	-0.495743	0	-0.691629	0	-0.600198
Flux to PEP from oxaolacetatecyt	R5	0.297078	0.345333	1.09148e-10	3.72971e-10	3.16391e-11	2.95373e-10	0	0	0	0	0	0	0	0		Acetate	-0.0885319	-0.0756196	-0.0879149	-0.0837905	-0.088532	-0.000378285	-0.0879151	-0.00791502	-0.088532	-0.000696354	-0.0879151	-0.00673298
Flux into glyoxylate	R6	0	0.05	0.239427	0.327935	0	0	0.239426	0.106314	0	0	0.239426	0.3275	0	0		Succinate	-8.06581e-08	-0.00932613	6.82504e-12	-3.03997e-09	4.77458e-10	-0.000588067	0	0	0	-0.0843969	0	0
Flux into ethanol from Acetaldehyde	R7	0.937284	0.0110535	0.996075	0.964761	0.997818	0.941428	0.996075	0.939416	0.997818	0.932841	0.99609	0.960136	0.997833	0.940454		Oxygen	2.4	2.4	2.4	2.4	2.4	2.4	2.4	2.4	2.4	2.4	2.4	2.4
Flux into Glycerol	R8	0.100843	0.0359931	2.44178e-09	0.056637	7.76208e-12	0.046003	0	0.0320916	0	0.0359807	0	0.0502137	0	0.0436316
				0.00243387	0.00213498	0.0015865	0.000178847	0.00243387	0.000426472	0.0015865	0.000225034	0.00243442	0.00207292	0.00158707	0.000183181
AEROBIC CHEMOSTAT - S.cerevisiae				minimizn of Euclidean Norm				minimizn of absolute sum of fluxes				Geometric FBA						minimizn of Euclidean Norm				minimizn of absolute sum of fluxes				Geometric FBA
						GLX. Pathway is zero				GLX. Pathway is zero				GLX. Pathway is zero			mmol/g/h			GLX. Pathway is zero				GLX. Pathway is zero				GLX. Pathway is zero
		EXP	Std Dev.	Strict Opt	Flex Opt	Strict Opt	Flex Opt	Strict Opt	Flex Opt	Strict Opt	Flex Opt	Strict Opt	Flex Opt	Strict Opt	Flex Opt		EXCHANGE	Strict Opt	Flex Opt	Strict Opt	Flex Opt	Strict Opt	Flex Opt	Strict Opt	Flex Opt	Strict Opt	Flex Opt	Strict Opt	Flex Opt
Split between glycolysis and PPP	R1	0.485	0.0212132	0.595997	0.446871	0.524656	0.393584	0.588593	0	0.517533	0	0.58863	0.062957	0.517565	0		Growth	0.1	0.1	0.1	0.1	0.1	0.1	0.1	0.1	0.1	0.1	0.1	0.1
PEP to Pyruvate	R2	0.95539	0.01	0.964162	0.964358	0.96511	0.96548	0.964095	0.959489	0.965047	0.954928	0.964038	0.960291	0.964989	0.961131		Glucose	1.1123	1.15479	1.15614	1.20142	1.1123	1.155	1.15614	1.20454	1.1123	1.14612	1.15614	1.19709
Flux into TCA cycle	R3	0.63042	0.0254802	0.668724	0.655227	0.693442	0.684824	0.668109	0.638997	0.692866	0.632288	0.668109	0.644723	0.692866	0.669695		Ethanol	0	0	0	0	0	0	0	0	0	0	0	0
Flux into Acetaldehyde from Pyruvate	R4	0.0544755	0.01	0.0593184	0.0584557	0.0123572	0.00440223	0.0594286	0.0673816	0.0123804	0.0392214	0.0594243	0.0659543	0.0123789	0.0180604		Glycerol	0	0	0	0	0	0	0	0	0	0	0	0
Flux to PEP from oxaolacetatecyt	R5	0.0961798	0.0228817	1.77559e-11	1.28885e-11	9.41072e-13	3.06262e-12	0	0	0	0	0	0	0	0		Acetate	0	0	0	0	0	0	0	0	0	0	0	0
Flux into glyoxylate	R6	0	0.05	0.320697	0.345286	0	0	0.354412	0.340061	0	0	0.354412	0.341966	0	0		Succinate	0	0	0	0	0	0	0	0	0	0	0	0
Flux into ethanol from Acetaldehyde	R7	0	0.05	3.39382e-10	2.53101e-10	1.08321e-10	1.70999e-10	0	0	0	0	0	0	0	0		Oxygen	2.89199	3.00246	3.00596	3.12369	2.89199	3.22197	3.00596	3.56867	2.89199	3.15969	3.00596	3.31034
Flux into Glycerol	R8	0	0.05	2.22145e-11	1.57112e-11	1.30877e-12	4.46949e-12	0	0	0	0	0	0	0	0
				0.00332928	0.00262294	0.00171052	0.00249017	0.00353386	0.0219287	0.00166262	0.0202221	0.0035341	0.0172166	0.00166243	0.0207297
