# Supplementary material for: The role of flexibility and optimality in the prediction of intracellular fluxes of microbial central carbon metabolism
Source: Royal Society of Chemistry journal article supplement (doi:10.1039/c4mb00117f), 2014-06-25
Supplement: c4mb00117f3.xlsx [file c4mb00117f3.xlsx]

## Sheet: Suppl. Table 2
Supplementary Table 2: Comparison of the by-product secretion behaviours of E. coli and S. cerevisiae in terms of the flexible-optimality and strict-optimality approaches
	Flexible-optimality (Quadr. Prog.)	Strict-optimality	Experimental
E.coli aerobic batch	Acetate Production: 4.54 mmole/gDW/hr	Acetate Production: 3.86 mmole/gDW/hr	Acetate Production: 4.80 mmole/gDW/hr
E. coli anaerobic batch	Acetate Split Ratio (R9) : 0.31 Ethanol Split Ratio (R10) : 0.62	Acetate Split Ratio (R9) : 0.46 Ethanol Split Ratio (R10): 0.47	Acetate Split Ratio (R9) : 0.34 Ethanol Split Ratio (R10) : 0.61
S.cerevisiae aerobic batch	Glycerol Production: YES	Glycerol Production: NO	Glycerol Production: YES
S.cerevisiae anaerobic chemostat	Glycerol Production: 0.81 mmole/gDW/hr	Glycerol Production: 0.45 mmole/gDW/hr	Glycerol Production: 1.05 mmole/gDW/hr
