# Supplementary material for: The role of flexibility and optimality in the prediction of intracellular fluxes of microbial central carbon metabolism
Source: Royal Society of Chemistry journal article supplement (doi:10.1039/c4mb00117f), 2014-06-25
Supplement: c4mb00117f4.pdf [file c4mb00117f4.pdf]

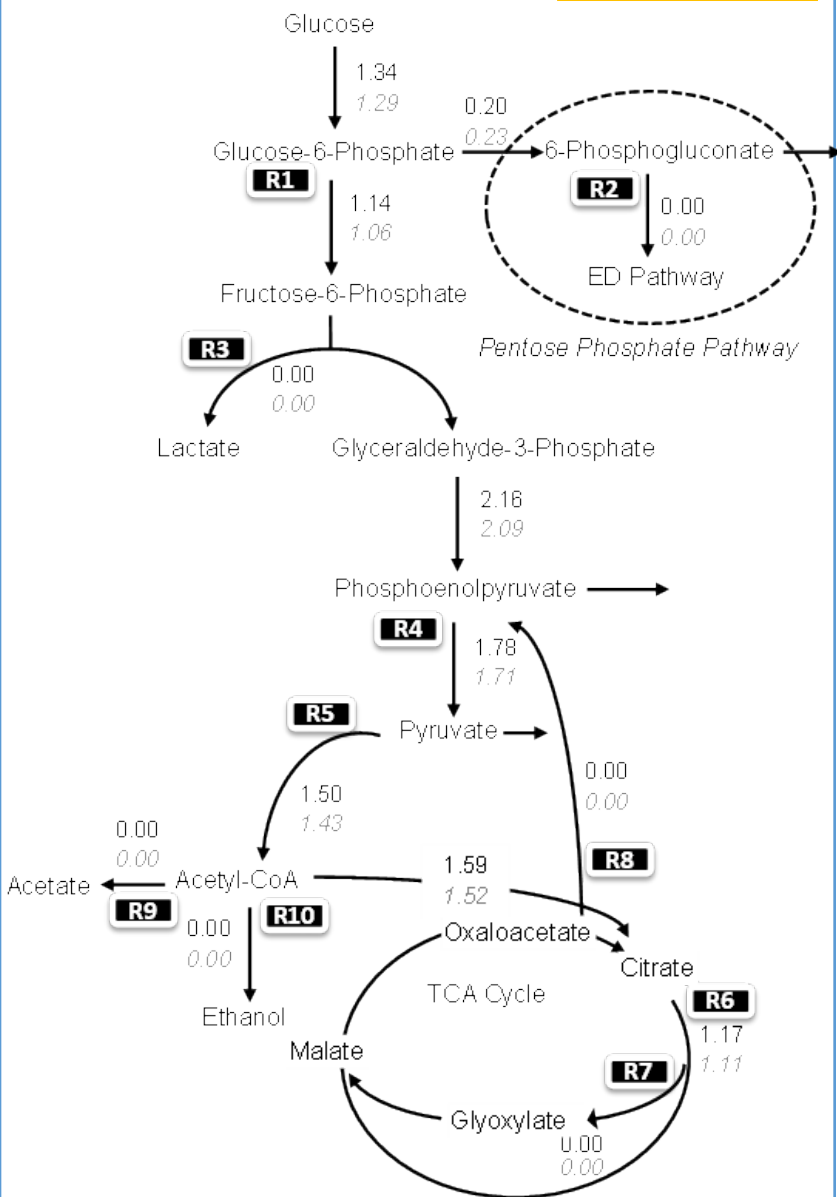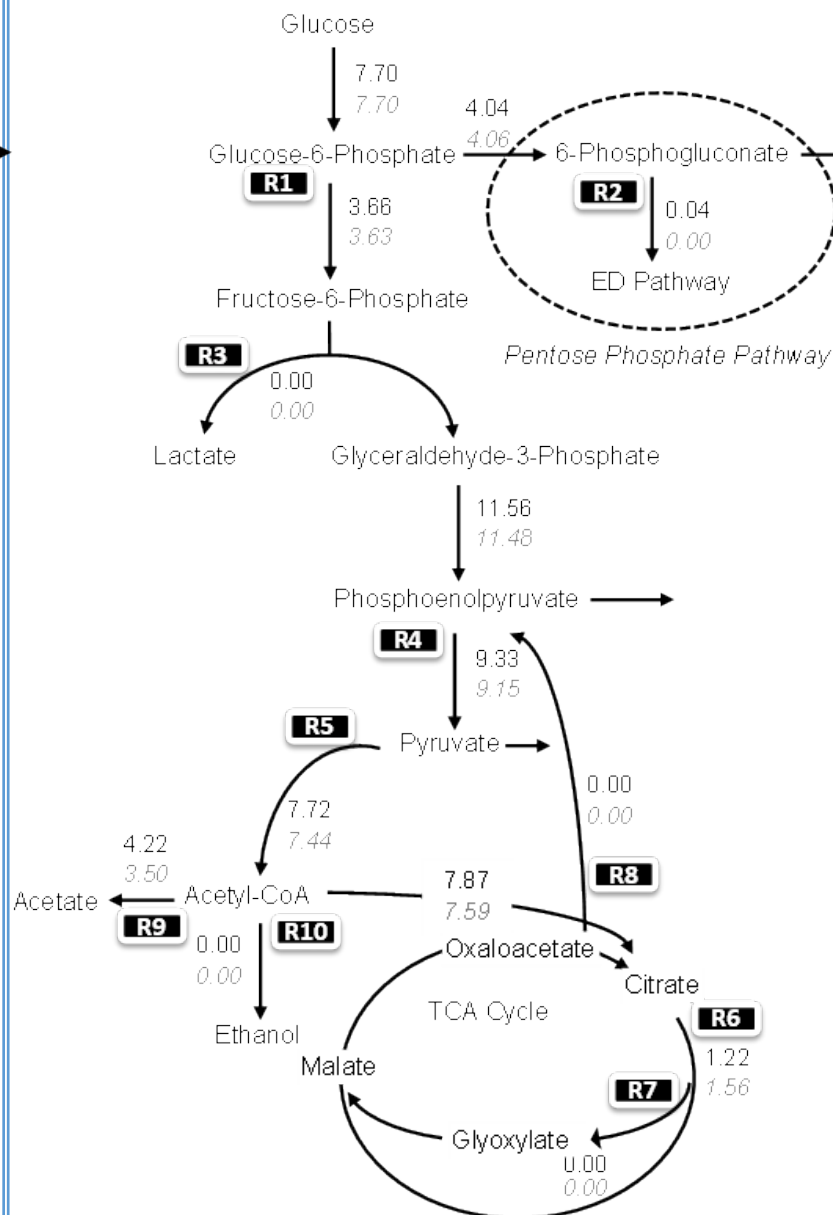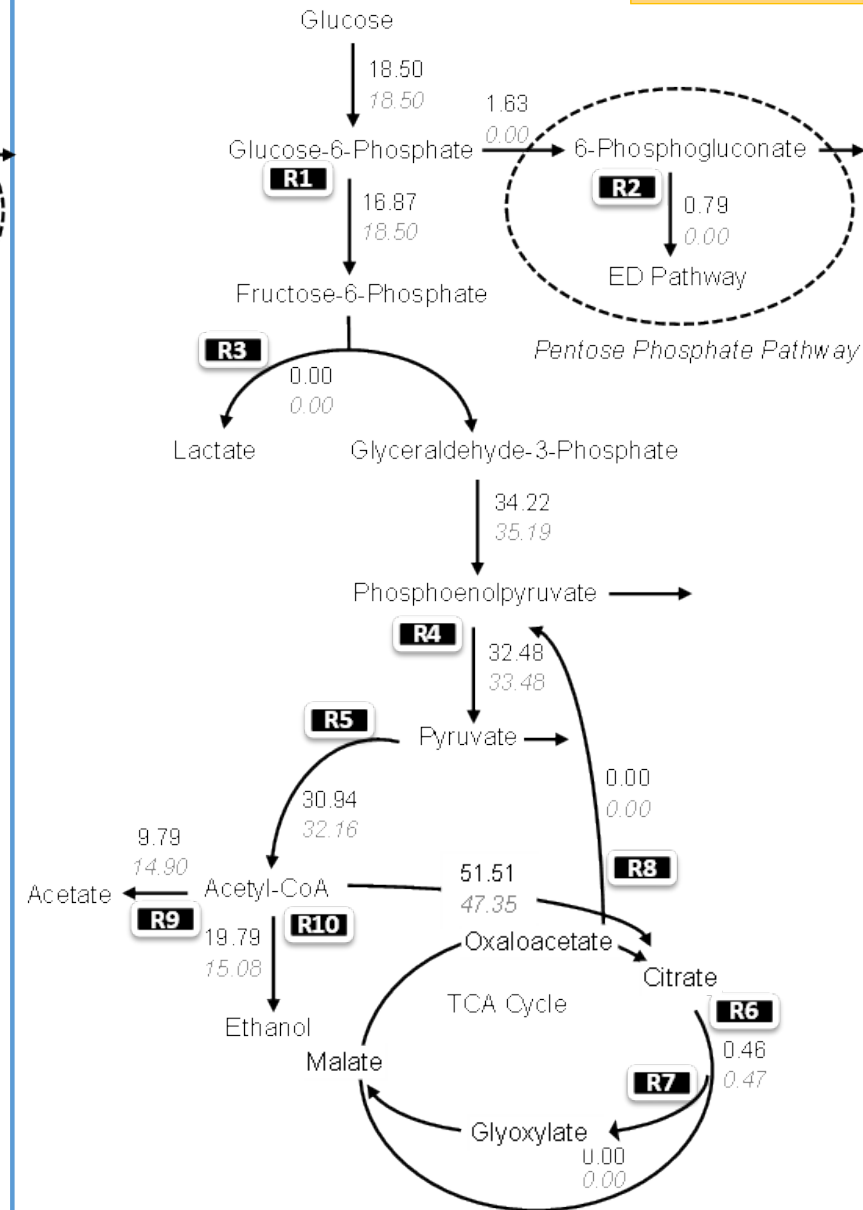

**Supplementary Figure 1:** Major fluxes of central carbon metabolism and the split branches for *E. coli* for the three studied conditions

***Saccharomyces cerevisiae*  
Anaerobic Chemostat**

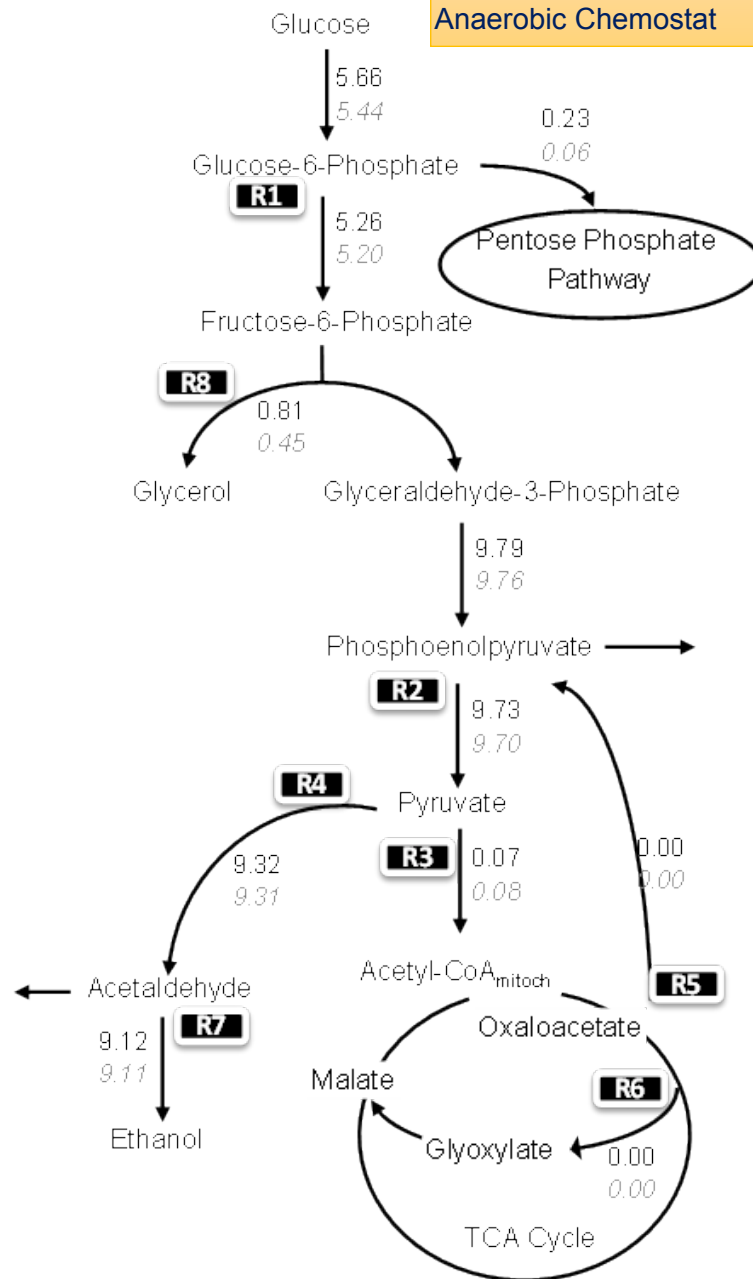

***Saccharomyces cerevisiae*  
Aerobic Batch  
Inactive Glyoxylate Shunt**

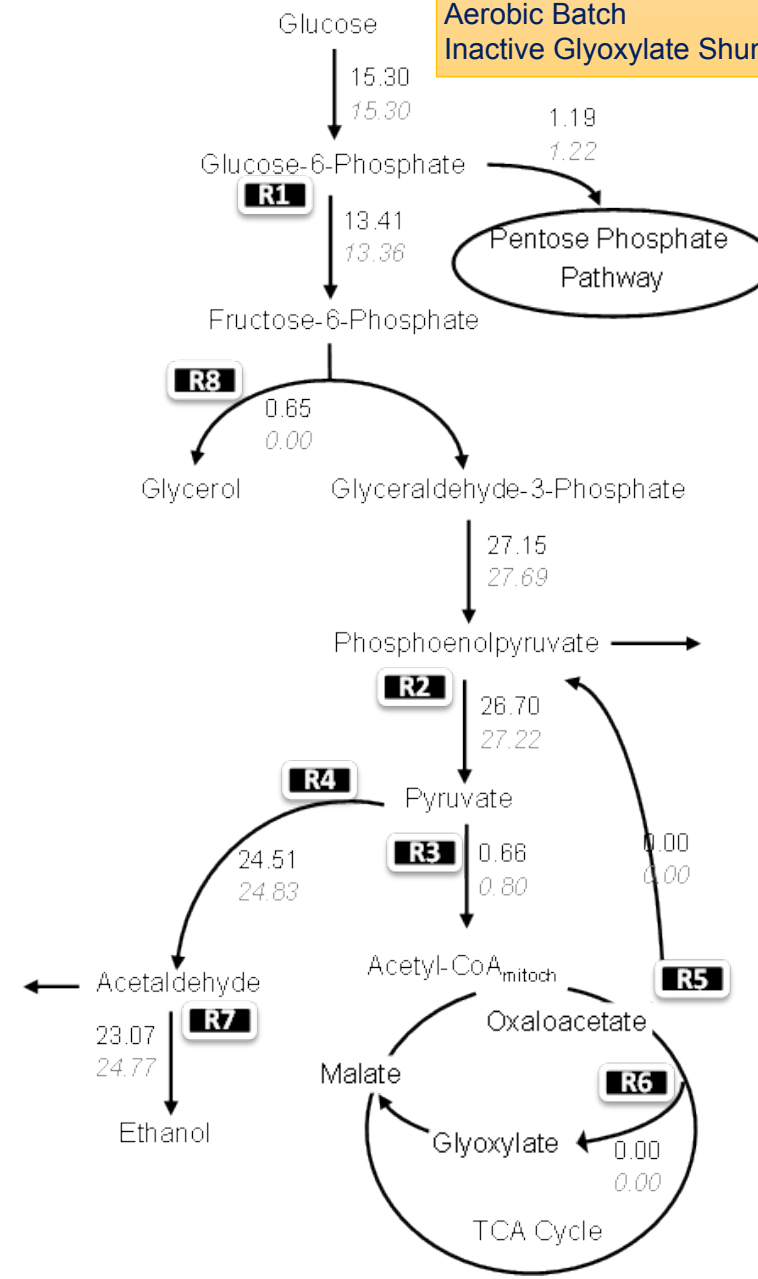

***Saccharomyces cerevisiae*  
Aerobic Chemostat  
Inactive Glyoxylate Shunt**

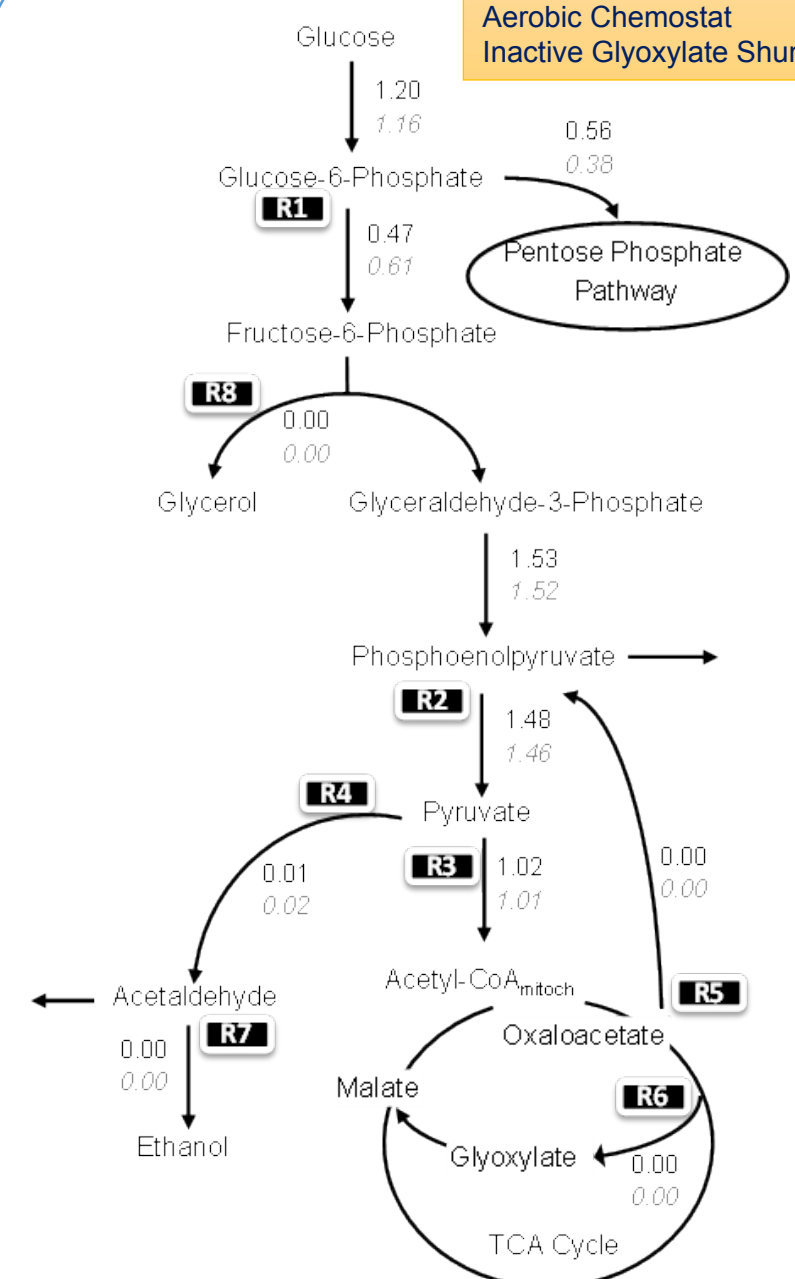

**Supplementary Figure 2: Major fluxes of central carbon metabolism and the split branches for *S. cerevisiae* for the three studied conditions**
